# Supplementary material for: Fabrication of Nano-Silver–Silver Ion Composite Antibacterial Agents for Green Powder Coatings
Source: MDPI journal article supplement (doi:10.3390/coatings13030575), 2023-03-07
Supplement: s1 [file s1]

# Supplementary Materials: Fabrication of Nano-silver–Silver Ion Composite Antibacterial Agents for Green Powder Coatings

Haiping Zhang <sup>1</sup>, Jixing Cui <sup>1</sup>, Jesse Zhu <sup>1,2</sup>, Yuanyuan Shao <sup>3,4</sup> and Hui Zhang <sup>2,5,\*</sup>

<sup>1</sup> School of Chemical Engineering and Technology, Tianjin University, Tianjin 300072, China; hpzhang@tju.edu.cn (H.Z.); cuijixing@tju.edu.cn (J.C.); jzhu@uwo.ca (J.Z.)

<sup>2</sup> Department of Chemical and Biochemical Engineering, Western University, London, ON N6A 3K7, Canada

<sup>3</sup> Nottingham Ningbo China Beacons of Excellence Research and Innovation Institute, The University of Nottingham Ningbo China, Ningbo 315100, China; yuanyuan.shao@nottingham.edu.cn

<sup>4</sup> Particle Technology Industrial Engineering Center, Zhejiang Institute of Tianjin University, Shaoxing 312300, China

<sup>5</sup> School of Chemical Engineering and Light Industry, Guangdong University of Technology, Guangzhou 510006, China

\* Correspondence: hzhang1@uwo.ca

**Table S1.** Data sheet for Figure 5.

| AgNPs(a)-Z |         | AgNPs(a)-M |         | AgNPs(b)-Z |         | AgNPs(b)-M |         |
|------------|---------|------------|---------|------------|---------|------------|---------|
| Wash Cycle | R Value |
| 1          | 5.65    | 1          | 5.81    | 1          | 5.23    | 1          | 5.15    |
| 2.5        | 5.51    | 2.5        | 5.74    | 3          | 5.13    | 2.5        | 5.11    |
| 5          | 5.15    | 3.5        | 5.30    | 6          | 4.67    | 6          | 4.95    |
| 7          | 4.85    | 7          | 4.73    | 7          | 4.33    | 8.5        | 4.71    |
| 10         | 4.55    | 10         | 4.53    | 10         | 3.54    | 10         | 4.20    |
| 12         | 4.17    | 11         | 4.17    | 12.5       | 2.97    | 12.5       | 3.66    |
| 15         | 3.42    | 14         | 3.68    | 15         | 1.94    | 15         | 2.72    |
| 18         | 2.55    | 15         | 3.21    | 20         | 1.08    | 17.5       | 2.20    |
| 20         | 2.35    | 17.5       | 2.84    | -          | -       | 20         | 1.78    |
| -          | -       | 20         | 2.25    | -          | -       | -          | -       |

**Table S2.** Data sheet for Figure 6.

| Samples    | Yellowish Color Difference |
|------------|----------------------------|
| AgNPs(a)-Z | 2.32                       |
| AgNPs(a)-M | 2.18                       |
| AgNPs(b)-Z | 3.38                       |
| AgNPs(b)-M | 3.29                       |

**Table S3.** Data sheet for Figure 7.

| Samples    | Gloss | Samples    | Haze  |
|------------|-------|------------|-------|
| Control    | 94.63 | Control    | 19.58 |
| AgNPs(a)-Z | 81.49 | AgNPs(a)-Z | 28.96 |
| AgNPs(a)-M | 81.49 | AgNPs(a)-M | 24.78 |
| AgNPs(b)-Z | 84.48 | AgNPs(b)-Z | 30.54 |
| AgNPs(b)-M | 88.66 | AgNPs(b)-M | 27.19 |
